# Supplementary material
Source: Springer Nature journal article supplement (https://www.springermedizin.de/resource/supplementary/12985_2009_623_MOESM11_ESM.pdf/9608128)

**A****HPV16 Infection in Cathepsin B and L +/+ and -/- MEFs**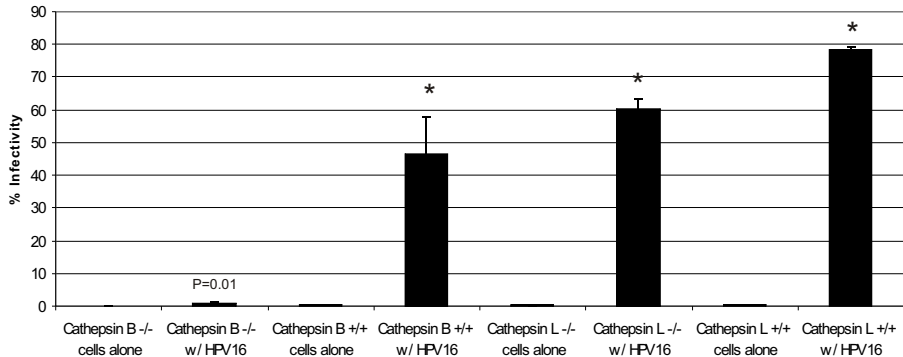

\* =P&lt;0.01

Supplement: MOESM11 [file 9608128]
